# Supplementary material for: Revealing oral microbiota composition and functionality associated with heavy cigarette smoking
Source: Springer Nature journal article supplement (doi:10.1186/s12967-020-02579-3), 2020-11-09
Supplement: MOESM1 [file 18573344]

**Revealing oral microbiota composition and functionality associated with heavy cigarette smoking.**

Mohammad Tahseen AL Bataineh<sub>1,2\*</sub>, Nihar Ranjan Dash<sub>1</sub>, Mohammed Elkhazendar<sub>1</sub>, Dua'a Mohammad

Hasan Alnusairat<sup>1</sup>, Islam Mohammad Ismail Darwish<sup>1</sup>, Mohamed Saleh Al-Hajjaj<sup>1,3</sup>, Qutayba Hamid<sup>2,4</sup>

**Additional file 1**

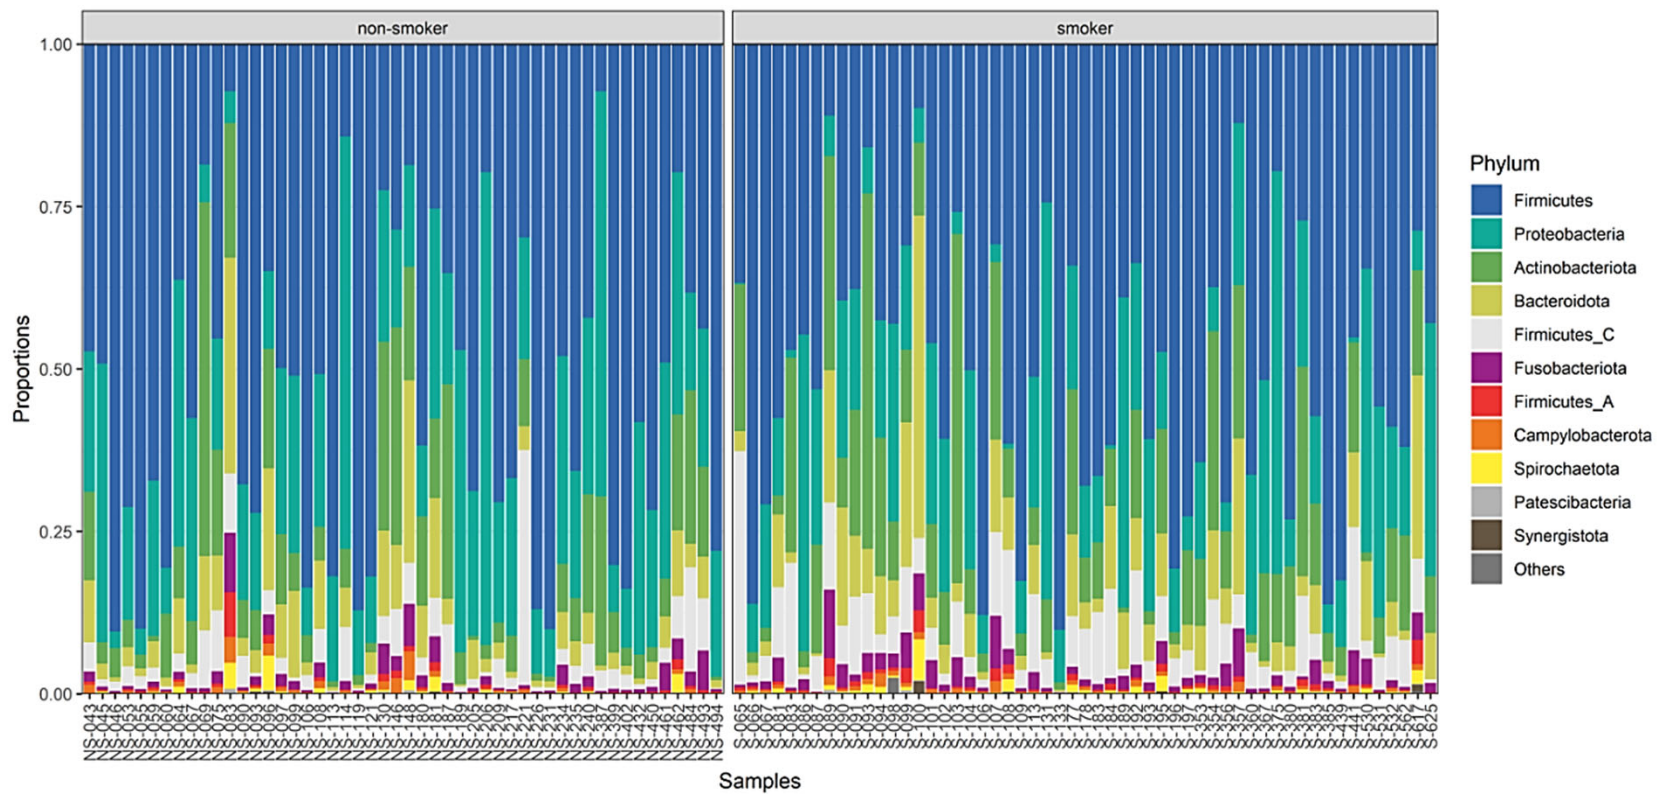

**Figure S1. Oral microbiota community composition of smokers vs. non-smoker groups.**

We aggregated taxa abundances into genera, and plotted the relative abundances of the most abundant ones. In the figure legends, “Other” represents lower-abundance taxa.

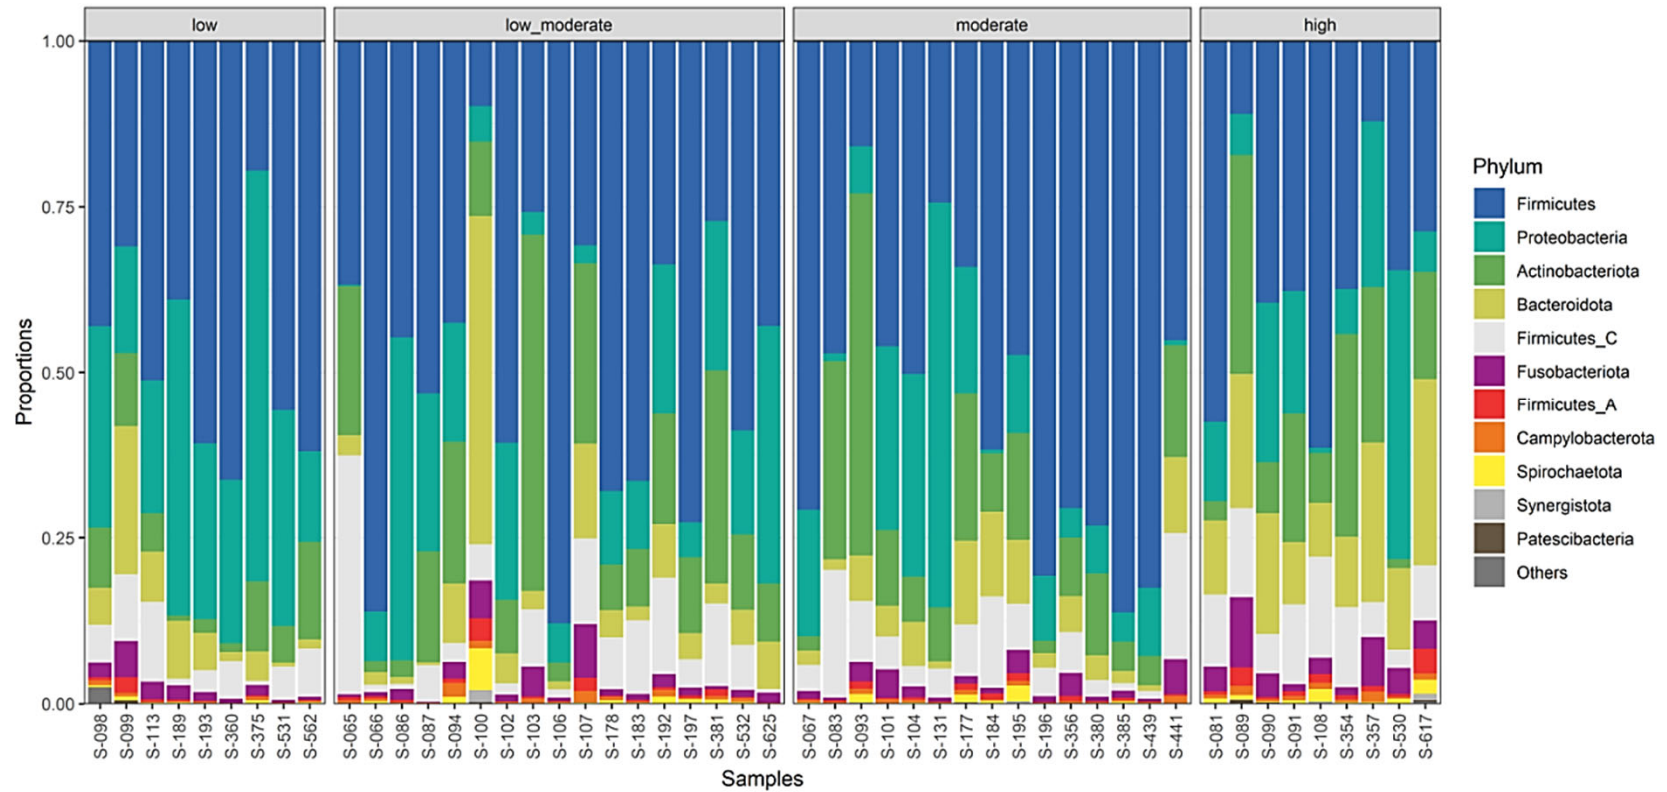

**Figure S2. Oral microbiota composition based on Fagerström Test for Nicotine Dependence (FTND) score**

We aggregated taxa abundances into genera, and plotted the relative abundances of the most abundant ones based on participant's FTND score; 1 – 2 (low dependence), 3 - 4 (low to mod dependence), 5 - 7 (moderate dependence), and  $\geq 8$  (high dependence). In the figure legends, "Other" represents lower-abundance taxa.

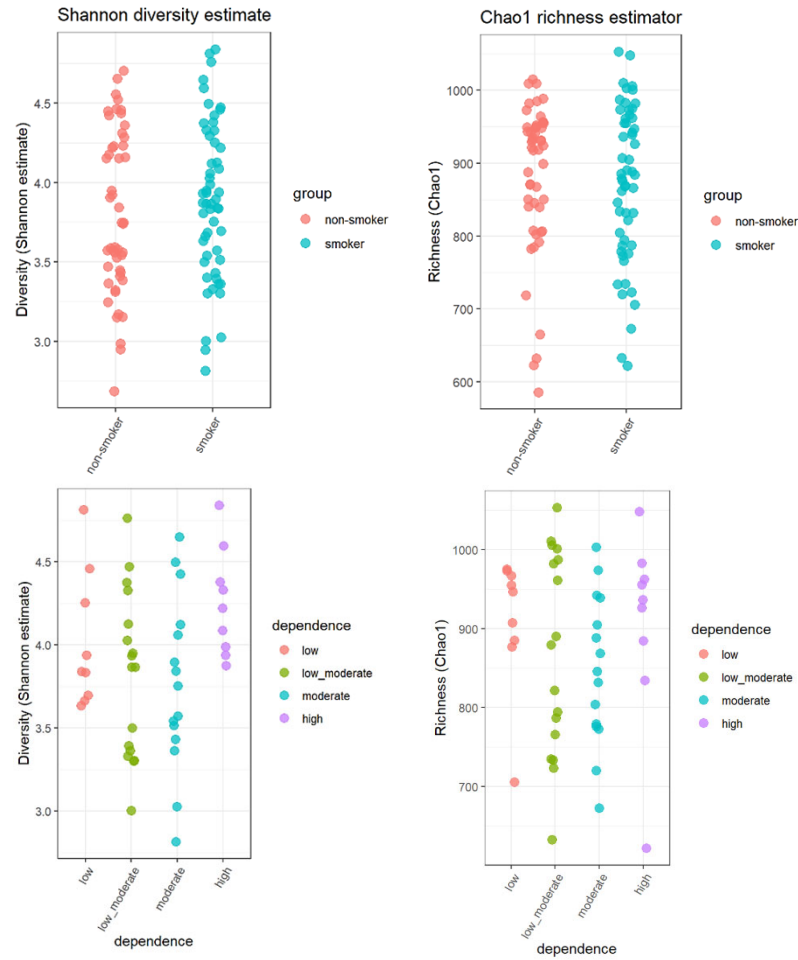

**Figure S3. Effects of smoking and nicotine dependence on oral microbiota richness and diversity.** Evaluation of the alpha-diversity in the 108 analyzed samples. Outlined reports the alpha diversity distributions of bacteria Shannon's diversity index and Chao1 richness estimator shows no significant differences across different groups were found.
